# Supplementary material for: The dorsal posterior insula subserves a fundamental role in human pain
Source: Springer Nature journal article supplement (doi:10.1038/nn.3969), 2015-03-09
Supplement: 41593_2015_BFnn3969_MOESM48_ESM.pdf [file 41593_2015_BFnn3969_MOESM48_ESM.pdf]

**a.**

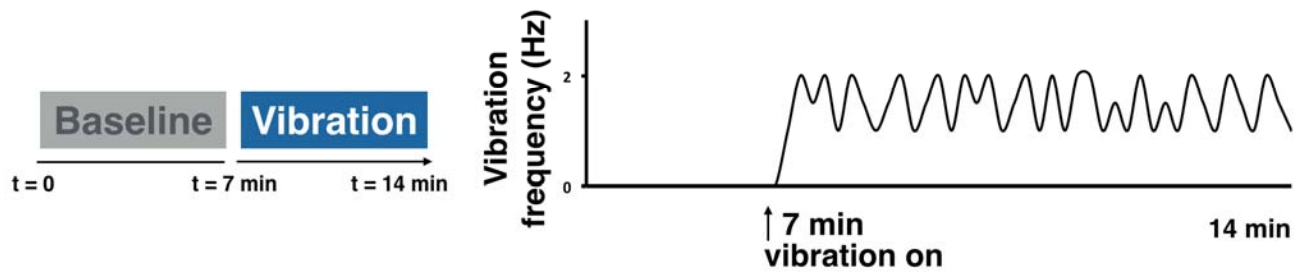

**b.**

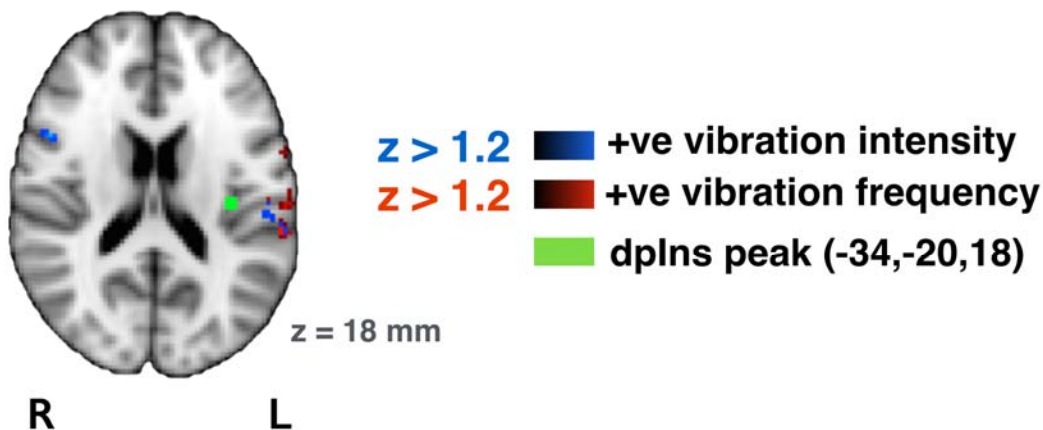

Supplementary Figure 1

Innocuous, ongoing vibration induced CBF changes.

a) Schematic of the vibration scan paradigm design that consisted of two identical multi-TI pCASL scans (parameters identical to those described in the methods section). The baseline scan consisted of no vibration stimulation (grey); while the vibration scan (blue) consisted of a continuously oscillating non-noxious stimulation of the subject's foot for the duration of the 7min scan. To minimize habituation effects, the vibration stimulus frequency was oscillated between 1-2.0 Hz (fixed amplitude of 1mA) using 0.5Hz step changes, at pseudorandom intervals between 20-60 seconds. Subjects were prompted to rate the stimulus intensity using a COVAS scale as discussed previously. None of the subjects reported the vibration stimulation as painful (group mean pain intensity = 0). The group mean vibration saliency rating for the full vibration scan was 3.12 (s.e.m. =0.265). For clarity, a plot of vibration frequency over time is displayed in Figure (a) above. b) No significant correlation was observed between absolute CBF and either the ongoing vibration intensity levels applied or with the ongoing perceived stimulus intensity levels reported by the subjects (Mixed Effects,  $z > 2.3$ ,

$p < 0.05$ ; cluster corrected;  $n = 12$ ). However, sub-threshold activation clusters are visible within the contralateral medial operculum; a subsection of the "posterior insular and adjoining medial operculum" (PIMO) region that Garcia-Larrea and others have highlighted as being linked to non-noxious sensory processing. For clarity, the non-significant sub-threshold clusters are shown in (b): red pixels represent the absolute CBF increases correlated with the ongoing vibration stimulus intensity applied to the subject's foot (i.e. stimulus frequency). Blue pixels represent the absolute CBF increases correlated with the perceived stimulus intensity ratings reported by the subjects. The cluster in green represents the peak dplns cluster that shows a strong positive correlation with ongoing pain intensity reported in the current study. Statistical maps were overlaid on selected slices of the MNI brain. Radiological convention is used (L: left; R: right).

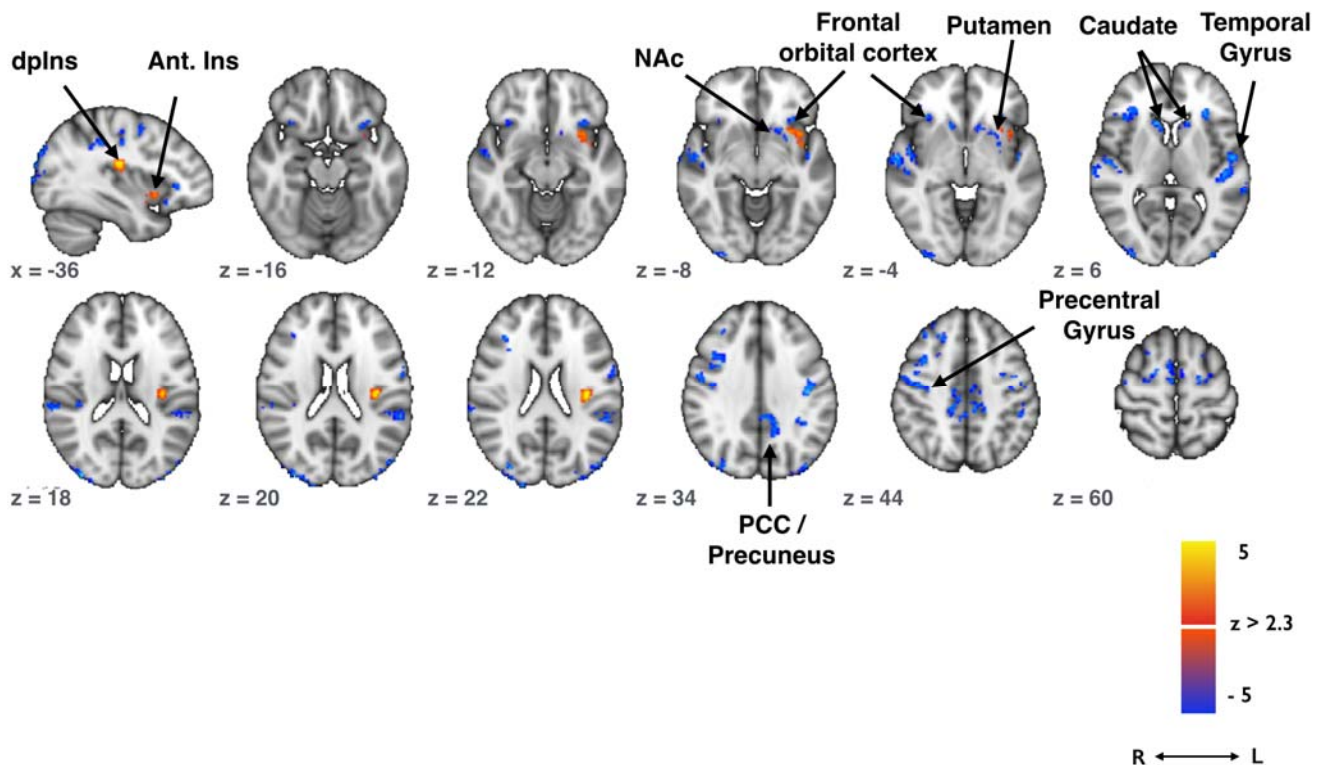

Supplementary Figure 2

Peak pain period perfusion changes.

Absolute CBF changes during the 7-minute peak of the pain experience (peak pain period only vs baseline; Mixed Effects:  $z > 2.3, p < 0.05$ ). Statistical maps were overlaid on selected slices of the MNI brain. Radiological convention is used. Orange pixels represent supra-threshold absolute CBF increases while blue pixels represent decreases. The anatomical locations for significant changes in CBF are listed in Supplementary table 2. These data highlight that the peak capsaicin pain relative to baseline is linked to positive and negative perfusion changes in a select group of brain regions, some of which have been previously shown as involved in pain processing (ref. 5 and Baliki, M.N. et al. *Nat. Neurosci.* **15**, 1117–1119, 2012). Importantly, the region that shows maximal hyper-perfusion during the ‘peak pain’ compared to baseline is localized to the contralateral dplns (mean CBF change  $\pm$  s.e.m;  $15 \pm 4.1\%$  or  $6.9 \pm 1.9$  ml / 100 g blood / min). This data supports the results from the regression analysis displayed in Figure 2; where the dplns cluster reaches a peak of activity at the time point of maximum capsaicin-induced pain. Importantly, none of the other regions identified here show a significant correlation with the ongoing pain ratings, as we found was the case for the dplns, even with a less strict statistical threshold. Radiological convention is used. L, left; R, right; dplns, dorsal posterior insula; Ant. Ins, anterior insula; NAc, nucleus accumbens; PCC, posterior cingulate.

## Supplementary Table 1

### one-way ANOVA

| Interactions                         | p-value (Bonferroni corrected) | F value | DOF |
|--------------------------------------|--------------------------------|---------|-----|
| Time x Rating (Phase I)              | 0.046 *                        | 4.201   | 6   |
| Condition x Rating (full experiment) | <0.001 *                       | 108.69  | 12  |

### post hoc pairwise comparisons of pain conditions

| Condition (A)      | Condition (B) | Mean Difference (A-B) | p-value (Bonferroni corrected) |
|--------------------|---------------|-----------------------|--------------------------------|
| <b>Baseline</b>    | Peak pain     | -49.844 *             | <0.001                         |
|                    | Habituation   | -20.802 *             | <0.001                         |
|                    | Rekindled     | -56.146 *             | <0.001                         |
|                    | Relief        | -2.438 *              | 0.762                          |
| <b>Peak pain</b>   | Baseline      | 49.844 *              | <0.001                         |
|                    | Habituation   | 29.042 *              | 0.008                          |
|                    | Rekindled     | -6                    | 1                              |
|                    | Relief        | 47.406 *              | <0.001                         |
| <b>Habituation</b> | Baseline      | 20.802 *              | <0.001                         |
|                    | Peak pain     | -29.042 *             | 0.008                          |
|                    | Rekindled     | -35.344 *             | <0.001                         |
|                    | Relief        | 18.365 *              | 0.002                          |
| <b>Rekindled</b>   | Baseline      | 56.146 *              | <0.001                         |
|                    | Peak pain     | 6                     | 1                              |
|                    | Habituation   | 35.344 *              | <0.001                         |
|                    | Relief        | 53.708 *              | <0.001                         |
| <b>Relief</b>      | Baseline      | 2                     | 0.762                          |
|                    | Peak pain     | -47.406 *             | <0.001                         |
|                    | Habituation   | -18.365 *             | 0.002                          |
|                    | Rekindled     | -53.708 *             | <0.001                         |

## Supplementary Table 2

|                                           | <i>Volume</i> | <b>Anatomical label<br/>(COG)</b> | <b>COG MNI<br/>coordinates</b> |          |          | <i>Peak Z-<br/>score</i> |
|-------------------------------------------|---------------|-----------------------------------|--------------------------------|----------|----------|--------------------------|
| <b>CBF increases (peak &gt; baseline)</b> |               |                                   | <b>X</b>                       | <b>Y</b> | <b>Z</b> |                          |
| <i>Cluster 1</i>                          | 728           | L. insula cortex                  | -34                            | 11       | -9       | 4.36                     |
| <i>Cluster 2</i>                          | 936           | L. insula cortex                  | -35                            | -20      | 20       | 3.34                     |
|                                           | <i>Volume</i> | <b>Anatomical label<br/>(COG)</b> | <b>COG MNI<br/>coordinates</b> |          |          | <i>Peak Z-<br/>score</i> |
| <b>CBF decreases (peak &lt; baseline)</b> |               |                                   | <b>X</b>                       | <b>Y</b> | <b>Z</b> |                          |
| <i>Cluster 1</i>                          | 968           | L. post cingulate                 | -11                            | -25      | 42       | 3.39                     |
| <i>Cluster 2</i>                          | 1024          | L. putamen                        | -19                            | 14       | -2       | 3.18                     |
| <i>Cluster 3</i>                          | 1024          | R. caudate                        | 13                             | 18       | 5        | 3.63                     |
| <i>Cluster 4</i>                          | 1032          | R. trans. temporal gyrus          | 50                             | -20      | 10       | 3.56                     |
| <i>Cluster 5</i>                          | 1056          | R. post. cingulate                | 11                             | -26      | 43       | 3.37                     |
| <i>Cluster 6</i>                          | 1096          | L. supramarginal gyrus            | -40                            | -39      | 39       | 3.35                     |
| <i>Cluster 7</i>                          | 1128          | L. inf. frontal gyrus             | -32                            | 26       | -3       | 3.61                     |
| <i>Cluster 8</i>                          | 1472          | R. SMA                            | 1                              | 0        | 59       | 3.31                     |
| <i>Cluster 9</i>                          | 1504          | R. frontal orbital cortex         | 36                             | 29       | 1        | 3.67                     |
| <i>Cluster 10</i>                         | 1528          | L. lat. occipital cortex          | -37                            | -87      | 24       | 3.39                     |
| <i>Cluster 11</i>                         | 1552          | R. sup. frontal gyrus             | 29                             | 27       | 46       | 3.44                     |
| <i>Cluster 12</i>                         | 1936          | L. precentral gyrus               | -46                            | -11      | 36       | 3.77                     |
| <i>Cluster 13</i>                         | 2000          | L. sup. frontal gyrus             | -29                            | -1       | 52       | 4.19                     |
| <i>Cluster 14</i>                         | 2048          | L. post. cingulate                | -5                             | -43      | 32       | 3.25                     |
| <i>Cluster 15</i>                         | 2872          | R. lat. occipital cortex          | 35                             | -88      | 18       | 4.04                     |
| <i>Cluster 16</i>                         | 3096          | L. cent. opercular cortex         | -51                            | -27      | 10       | 3.56                     |
| <i>Cluster 17</i>                         | 3144          | R. sup temporal gyrus             | 59                             | -16      | 2        | 3.73                     |
| <i>Cluster 18</i>                         | 6136          | R. mid. frontal gyrus             | 40                             | 0        | 43       | 4.21                     |
